## **Sex-specific glycosylation of secreted immunomodulatory proteins in the filarial nematode *Brugia malayi***

Joseph Koussa<sup>1,2,7</sup>, Burcu Vitrinel<sup>1</sup>, Peter Whitney<sup>1</sup>, Brian Kasper<sup>3</sup>, Lara K. Mahal<sup>3,4</sup>, Christine Vogel<sup>1</sup>, Sara Lustigman<sup>5</sup>, Kourosh Salehi-Ashtiani<sup>2</sup>, Elodie Ghedin<sup>1,6,7\*</sup>

<sup>1</sup> Department of Biology, New York University and Center for Genomics and Systems Biology (CGSB), New York, NY, USA

<sup>2</sup> Division of Science and Math, New York University Abu Dhabi, Abu Dhabi, UAE

<sup>3</sup> Department of Chemistry, New York University, New York, NY, USA

<sup>4</sup> Department of Chemistry, University of Alberta, Edmonton, AB, CANADA

<sup>5</sup> Laboratory of Molecular Parasitology, Lindsley F. Kimball Research Institute, The New York Blood Center, New York, NY, USA

<sup>6</sup> Department of Epidemiology, School of Global Public Health, New York University, New York, NY, USA

<sup>7</sup> Systems Genomics Section, Laboratory of Parasitic Diseases, National Institute of Allergy and Infectious Diseases, National Institutes of Health, Bethesda, MD, USA

\*Corresponding author: [elodie.ghedin@nih.gov](mailto:elodie.ghedin@nih.gov)

1 **Abstract**

2

3 The extended persistence of filarial nematodes within a host suggests immunomodulatory  
4 mechanisms that allow the parasites to resist or evade the host immune response. There is  
5 increasing evidence for immunomodulatory glycans expressed by a diversity of parasitic  
6 worms. In this study, we integrate multiple layers of the host-parasite interface to investigate  
7 the glycome of a model filarial parasite, *Brugia malayi*. We report a significant  
8 overrepresentation of terminal GalNAc moieties in adult female worms coupled with an overall  
9 upregulation in O-glycosylation, T-antigen expression, and a bias for galactose containing  
10 glycans. Adult males preferentially displayed a bias for terminal GlcNAc containing glycans,  
11 and fucosylated epitopes. Subsequent proteomic analysis confirmed sex-biases in protein  
12 glycosylation and highlighted the sex-specific glycosylation of well characterized  
13 immunomodulators expressed and secreted by *B. malayi*. We identify sex-specific effectors  
14 at that interface and suggest approaches to selectively interfere with the parasitic life cycle  
15 and potentially control transmission.

16

17

18

19

20

21

22

23

24

25

26

27

28

29

30

31

32

33

34

35

36

37

38

39

40

41

42

43

44

45

## 46 **Introduction**

47  
48 *Brugia malayi* is a parasitic nematode and, along with *Wuchereria bancrofti*, a causative agent  
49 of lymphatic filariasis in humans. The life cycle of *B. malayi* involves both a mosquito vector  
50 and a human host in which the worms can persist for up to eight years as adults colonizing  
51 the lymphatic system (Nutman). In contrast to the majority of nematodes, including the free-  
52 living model nematode *C. elegans*, parasitic worms like *B. malayi* are sexually dimorphic, with  
53 male and female worms coexisting within the same host. Once sexual maturity is reached  
54 (>120 days post infection), fertilized adult females release microfilariae (mf)—the youngest life  
55 stage of the worm—into blood circulation. These are then picked up by the mosquito during a  
56 blood meal. In the mosquito, the mf develops into infective stage 3 larvae (L3), which can be  
57 transmitted to a new human host during a subsequent blood meal.

58         Sexual dimorphism in parasitic nematodes has been suggested to be a response to  
59 host immune pressure (Gemmill et al.). Sexual dimorphism has been well characterized in *B.*  
60 *malayi* (Michalski and Weil; Jiang, Li, et al.; Kashyap et al.). At both the transcriptomic and  
61 proteomic levels, adult male and female *B. malayi* display sex biases in gene expression with  
62 adult males characterized by enrichment for genes involved in energy production, metabolic  
63 processes and cytoskeletal proteins, while adult females have gene expression profiles  
64 enriched in signatures for RNA modification and transcription (Jiang, Malone, et al.).  
65 Proteomic analysis of sex-specific secretomes from *B. malayi* identified significant differences  
66 between adult male and female worms; 70% of proteins secreted by adult males and 65%  
67 secreted by adult females were unique to each sex (Bennuru et al.).

68 More recently, proteomic analysis of exosome-like vesicles secreted from adult *B. malayi*  
69 revealed sex-dependence in protein cargo. Adult female-secreted vesicles had a high content  
70 in Bma-Galectin-2, Triose Phosphate isomerase (TPI), Macrophage migration inhibitory factor  
71 (MIF1) and Thioredoxin peroxidase 2 among others, while the male-secreted vesicles were  
72 enriched for small GTPases, structural actin and tubulin, and a subset of heat shock proteins  
73 (Harischandra et al.). While sex differences in *B. malayi* have been investigated at both  
74 transcriptomic and proteomic levels, they remain understudied at the glycomic level.

75

76 Well conserved across evolution, glycosylation is a dynamic, non-templated process,  
77 dependent on enzymatic and substrate availability and resulting in a diversity of carbohydrate  
78 structures. Glycosylation plays key roles in regulating diverse biological processes, ranging  
79 from signaling and immune activation to development and reproduction in eukaryotic  
80 organisms (Varki, Ajit; Cummings, R. D.; Esko, J. D.; Freeze, H. H.; Stanley, P.; Bertozzi, C.  
81 R.; Hart, G. W.; Etzler and E.). Glycosylation is also known to act as a checkpoint in the proper  
82 folding of proteins within secretory pathways, as a large portion of secreted proteins from  
83 eukaryotes are glycosylated. In helminthic infections, glycoconjugates are involved in the  
84 underlying immunomodulation of infected hosts (Prasanphanich et al.; Harn et al.; Van Vliet  
85 et al.; Khoo and Dell). Several such glycoconjugates are at the host-parasite interface. For  
86 example, parasite excreted/secreted (ES) glycoproteins were shown to actively modulate the  
87 host immune system by physically interacting with cell surface receptors on dendritic cells  
88 (DC) and macrophages (van den Berg et al.; Rodríguez et al.). Studies have shown that in *B.*  
89 *malayi*, intact glycan structures on secreted proteins are necessary for the induction of the  
90 characteristic Th2 immune responses (Tawill et al.). In the blood fluke *S. mansoni*, studies  
91 revealed significant sex differences in glycan structures where females mainly carried Gal $\beta$ 1-  
92 4GlcNAc (Type II LacNAc) and Gal $\beta$ 1-4(Fuc $\alpha$ 1-3)GlcNAc (LewisX) antennae structures,  
93 whereas in males GalNAc $\beta$ 1-4GlcNAc (Lacdi-NAc; LDN) and GalNAc $\beta$ 1-4(Fuc $\alpha$ 1-3)GlcNAc  
94 (LDN-F) were prevalent in N-glycans, suggesting differential effects on host responses  
95 (Wuhrer et al.). Studies of the parasitic worms *Fasciola hepatica*, *Oesophagostomum*  
96 *dentatum*, and *S. mansoni* report sex and life stage biases in N-glycosylation profiles  
97 (Rodríguez et al.; Jiménez-Castells et al.). However, little information exists with respect to O-  
98 glycosylation trends and an in-depth characterization of glycosylation in filarial nematodes is  
99 lacking. Unraveling the sex-specific glycode in *B. malayi* not only furthers our understanding  
100 of the biology of sexes and parasitism in nematodes, but also uncovers a set of new targets

101 for anti-helminthic therapies or vaccine development, with the unique feature of potentially  
102 targeting male or female worms independently.

103

104 Herein we profile protein glycosylation in *B. malayi* using lectin microarray technology  
105 (Pilobello, Slawek, et al.; Agrawal et al.; Heindel et al.) and combine that with an expanded  
106 analysis of the sex-specific secretomes. We identified sex-dependent glycan and glycoprotein  
107 expression. We focused on the identification of sex-specific differentially glycosylated proteins  
108 at the host-parasite interface and evaluated their potential role in the immunomodulatory  
109 arsenal of *B. malayi*. We report the differential glycosylation in male and female *B. malayi* of  
110 three previously characterized immunomodulatory proteins, Bma-MIF-1 (Prieto-Lafuente et  
111 al.), Bma-FAR-1(Zhan et al.) and Bma-IPGM-1 (Singh et al.). We also report the sex-  
112 dependent glycosylation of two recently suggested drug targets, a phosphoglycerate kinase  
113 (Bm13839) (Kumar et al.) and a Calumenin (Bm5089) (Choi et al.), along with a subset of  
114 immune-relevant proteins, further suggesting sex-specific host-parasite interactions, that may  
115 be moderated by glycans, in *B. malayi* infections.

116

117

118

119

120 **Results**

121 ***B. malayi* adult females secrete a larger diversity of proteins than adult males**

122

123 Although sex-dependent gene expression in *B. malayi* worms has been well characterized  
124 (Bennuru et al.; Hewitson et al.; Grote et al.; Moreno and Geary), the stage- and sex-specific  
125 secretomes remain only partially defined. To gain a more complete understanding of the *B.*  
126 *malayi* secretome, in light of updated genome annotations and updated chromosome  
127 assemblies (Fauver et al, Tracey et al, Ghedin et al), we collected ES proteins from worms  
128 cultured *in vitro* at different life stages —mf, L3, L4, adult males, and adult females (**Fig. 1A**).  
129 Label-free mass spectrometric analysis of these samples identified a total of 1,114 unique  
130 proteins across life stages and sexes in the *B. malayi* secretome (**Supp. Table S1a**). These  
131 included previously identified proteins as well as an additional 444 proteins. It is worth noting  
132 that 47% of all identified proteins have no associated known functions. A summary table  
133 detailing overlaps with all preceding *B. malayi* proteomic studies can be found in **Supp. Table**  
134 **S1b**. We recovered 60% of proteins identified in (Mersha et al.) as GPI-anchored and 80% of  
135 proteins from exosome-like vesicles (EV) secreted by both adult sexes (Harischandra et al.).  
136 We also recovered 72% and 78% of proteins identified by Moreno et al and Hewitson et al,  
137 respectively, as part of *B. malayi*'s secretome (Moreno and Geary; Hewitson et al.). However,  
138 we only overlapped with 18% of the proteins identified by Bennuru et al (Bennuru et al.) as  
139 part of the secretome. Our data indicate that 70% of detected proteins were shared by at least  
140 two of the stages and that adult females secreted the largest diversity of proteins with 238  
141 unique to this stage compared to 6 unique to adult males (**Fig. 1B**).

142

143

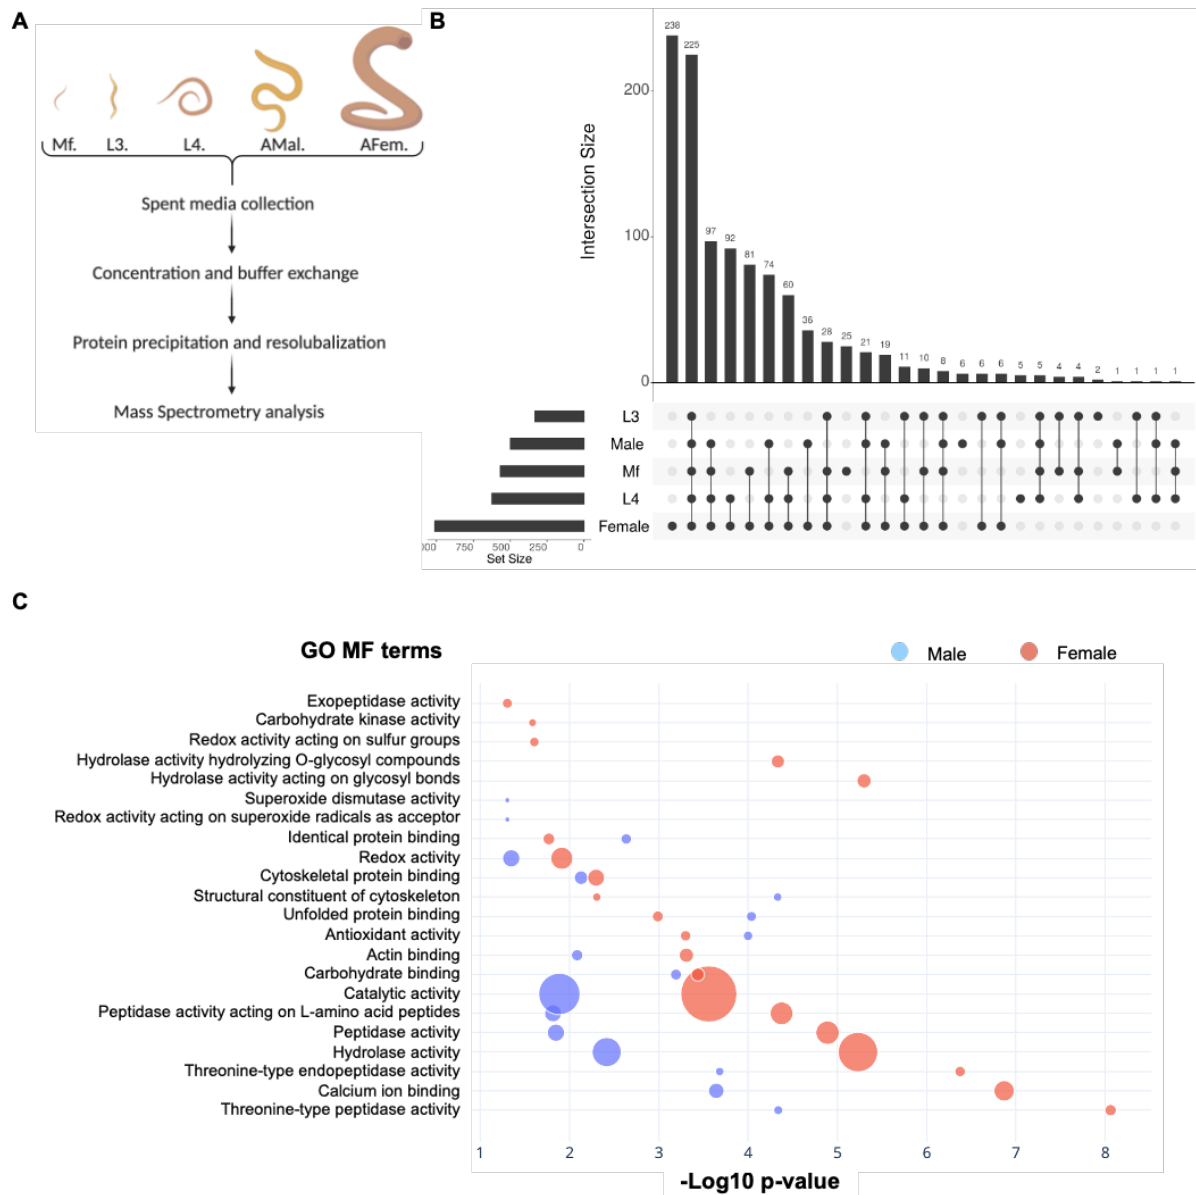

**Figure 1: Proteomic characterization of stage- and sex-specific secretomes in *B. malayi*.** **A.** Schematic representation of how *B. malayi* secretomes were collected for MS-MS analysis. **B.** UpsetR plot representing the intersections in stage- and sex-specific secretomes. The total number of proteins identified from each stage or sex are shown as set sizes. **C.** GO Molecular Function (MF) enrichment analysis of secreted proteins from adult males and females. Values shown represent  $-\text{Log}_{10}$  p-value and dot sizes are proportional to the number of proteins associated with each term.

144 To determine the functional implications of differentially secreted proteins, we performed  
 145 functional enrichment on the sex-dependent protein sets (**Fig. 1C**). In adult female worms, we  
 146 observed specific enrichment of hydrolases acting on glycosyl residues, carbohydrate kinases  
 147 and proteins involved in sulfur redox reactions ( $p$ -values  $< 0.05$ ), while in adult males we see  
 148 a significant enrichment of proteins involved in superoxide redox reactions and superoxide

149 dismutase activities (p-values < 0.05). Male and female adult *B. malayi* secrete a large number  
150 of proteins with catalytic activity (e.g. threonine-type endopeptidases) and carbohydrate  
151 binding proteins, both of which are associated with helminth immunomodulatory properties  
152 (McSorley et al.).

153

154

155 ***B. malayi* has a glycogenome conserved across the filariae.**

156

157 As observed for most eukaryotic organisms, helminths glycosylate secreted proteins. These  
158 glycoproteins play key roles in immune function, and glycosylation is crucial to their activity  
159 (Cvetkovic et al.; Ahmed et al.). It is therefore important to define glycan structures decorating  
160 secreted proteins at the host-parasite interface. Determining the diversity of glycan structures  
161 expressed by an organism is largely dictated by the nature and number of glycosylation-  
162 related enzymes and available substrates. To construct a comprehensive list of glycosylation  
163 enzymes, we interrogated the *B. malayi* genome using a series of functional annotations.  
164 Gene Ontology (GO) and KEGG annotations for genes and pathways were used to assign  
165 glycosylation-related proteins. We identified 116 genes with an associated GO term relevant  
166 to protein glycosylation and 143 genes assigned to KEGG glycosylation pathways. A full  
167 BLASTp search of the *B. malayi* proteome against a “human glycosylation proteome”  
168 uncovered 136 genes with significant similarities. A full genome Hidden Markov Model scan  
169 for protein families (Pfam) was done to complement the analysis, uncovering 112 genes with  
170 Pfam annotations relevant to protein glycosylation. Overall, 285 genes were identified and  
171 were assigned to the *B. malayi* glycogenome (**Fig. 2A; Supp. Table S2a**).



172 We evaluated the conservation of glycosylation across different clades of worms by  
 173 comparative analysis of glycosylation-related orthologs in other helminth genomes. The  
 174 analysis reveals a high degree of conservation within filarial nematodes (**Fig. 2B**, VII-XII) with  
 175 around 56% of the genes conserved at >50% similarity. The data also indicated clear  
 176 divergence from blood and liver flukes (**Fig. 2B**, V-VI) with 33% of the genes having no  
 177 orthologs, and an intermediate profile of conservation when compared to hookworms,  
 178 whipworms or the free-living nematode *C. elegans* with only 14% of the genes having no  
 179 orthologs (**Fig. 2B**, I, IV, and II, respectively). Overall, the data show a higher conservation  
 180 and similarity in the glycosomes of filarial parasites and class III nematodes, and a clear  
 181 divergence from trematodes such as *F. hepatica* and *S. mansoni*.

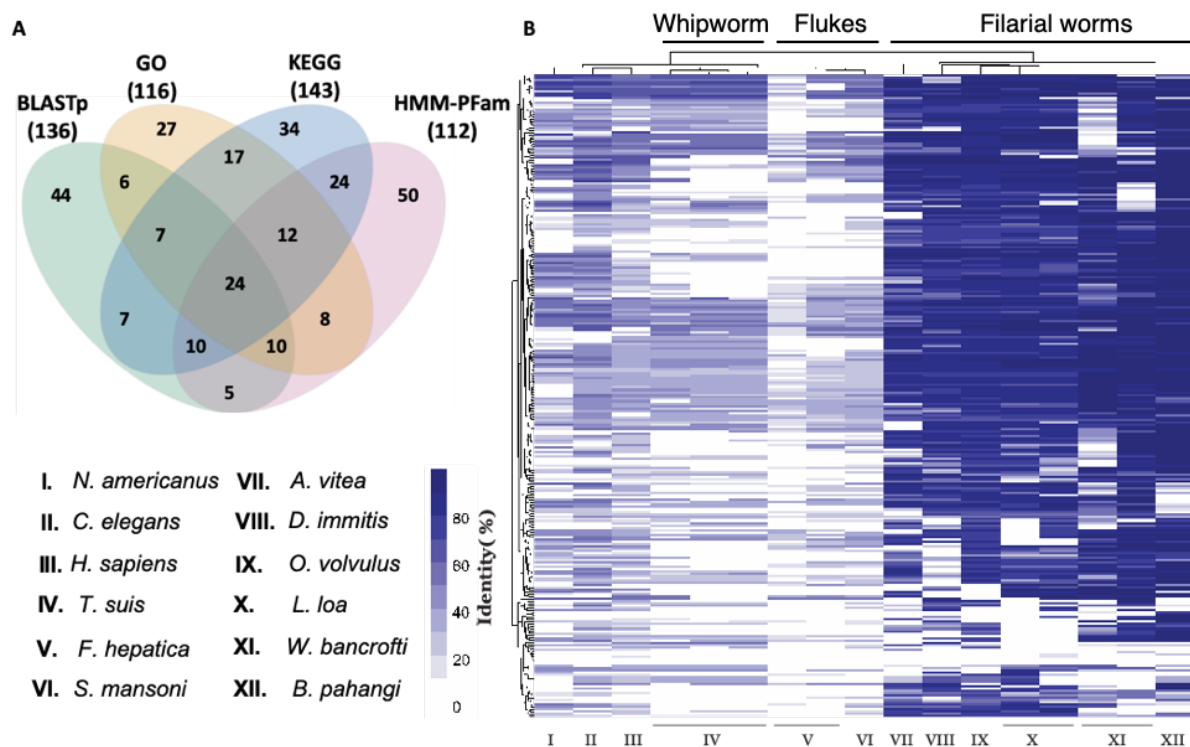

**Figure 2: *B. malayi*'s glycosome and ortholog analysis of glycosylation related genes across other worm genomes, and the human genome. A.** Venn diagram representing the overlap analysis of the different functional annotation approaches used to identify glycosylation related genes in *B. malayi*. **B.** Ortholog analysis of all *B. malayi* glycosylation genes in parasitic and non-parasitic worms. Data shown represent the percentage in genetic identity between *B. malayi* glycosylation related genes and their corresponding orthologs in other organisms.

182

183

184 **O- and N-glycan biosynthetic pathways are differentially expressed between male and**  
185 **female adult worms**

186  
187 To investigate whether expression of the glycometabolome is sex-dependent, we analyzed the  
188 transcriptome in adult male and female *B. malayi*. The overall expression profiles show high  
189 similarities between the sexes, as previously observed (Grote et al.). However, approximately  
190 43% of the 285 glycosylation-related genes were significantly differentially expressed (p-value  
191 < 0.05). The majority of these genes belong to O- and N-glycan-related biosynthetic pathways.  
192 Female *B. malayi* significantly upregulate 50 glycosylation-related genes while males  
193 upregulate 72 (**Supp. Table S2b**). Mapping these results onto the biosynthetic pathways  
194 suggests higher expression of core 2/6 O-glycans in male worms (**Fig. 3A**). The results also  
195 indicate sex-dependent expression of specific fucose type O-glycans, with males having  
196 higher levels of GlcNAc-Fuc-(ser/thr), while females modify this epitope further to form  
197 predominantly Gal-GlcNAc-Fuc-(ser/thr) (**Fig. 3B**).

198  
199 Females also show a higher expression of a protein-O-acetylglucosamine transferase  
200 (Bm4815), leading to the uncommon GlcNAc O-linked glycan epitope (**Fig. 3C**). Similarly, the  
201 mannose type O-glycan biosynthetic pathway shows male-biased expression of core M1 and  
202 core M2 glycans (**Fig. 3D**). Sex-dependent expression profiles are also apparent for N-type  
203 glycan biosynthetic pathways where males display a higher expression of 17 genes within the  
204 N-type glycosylation pathway as compared to 7 genes with higher expression in females; most  
205 are N-glycan precursor and trimming enzymes. Both sexes also express genes related to  
206 glycan degradation, such as mannosidases and glycosidases, primarily involved in  
207 oligomannose and paucimannose N-glycan biosynthetic pathways (**Supp. Table S2c**).

208

209

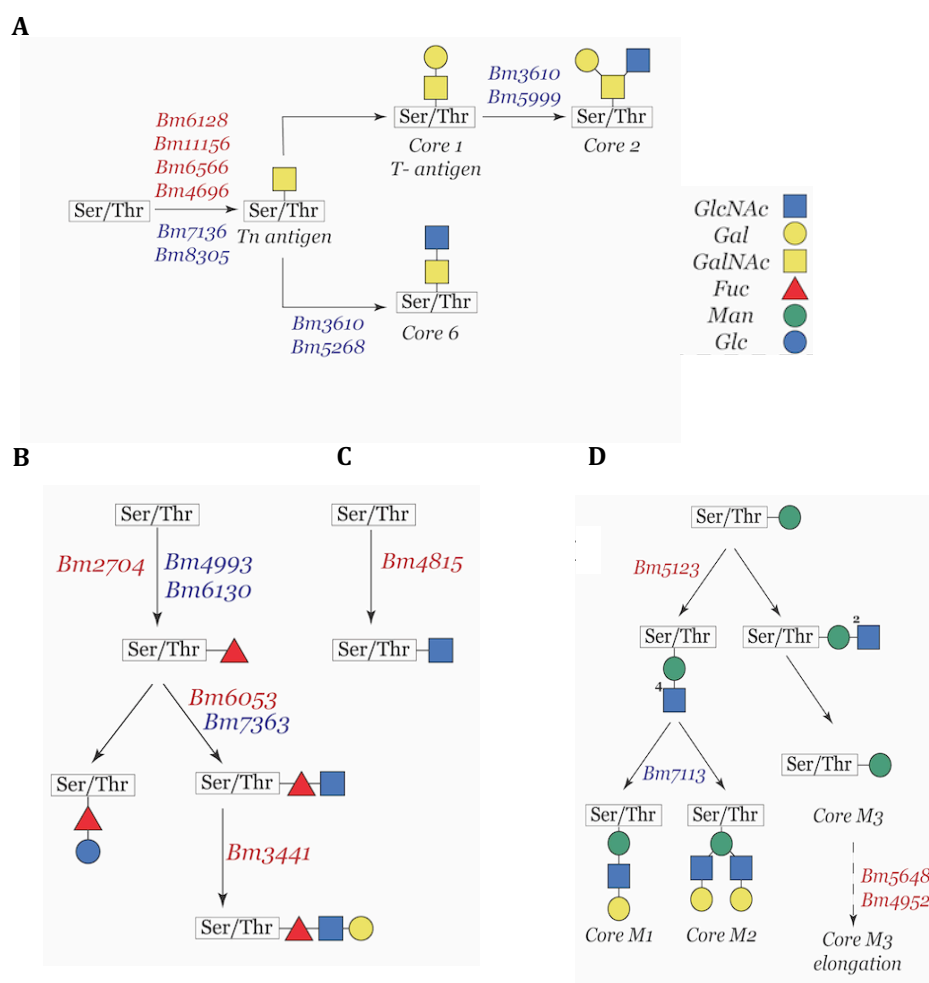

**Figure 3: Differential expression of O-glycosylation related genes in adult male and female *B. malayi*.** **A.** Partial representation of the mucin-type O-glycans biosynthetic pathway. **B.** *B. malayi* genes coding for enzymes catalyzing reactions are shown and color-coded. **B.** Fucose type O-glycans biosynthetic pathway and corresponding *B. malayi* genes color-coded by upregulation status. **C.** N-acetylglucosamine type O-glycans biosynthetic pathway and corresponding *B. malayi* genes color-coded by upregulation status. **D.** Partial representation of the mannose type O-glycans biosynthetic pathway and corresponding *B. malayi* genes color-coded by upregulation status. Upregulated genes in females are highlighted in red and those upregulated in males are highlighted in blue.

210

### 211 Glycan epitope expression is sex-biased in *B. malayi*

212

213 The study of glycosylation in *B. malayi* has primarily focused on GPI-anchored glycoproteins

214 and staining of worms with specific lectins (Mersha et al.; Schraermeyer et al.; Kaushal et al.).

215 A more general glycomic analysis of *B. malayi* has not been performed. To confirm whether

216 the observed sex-biased differential expression of the *B. malayi* glycogenome translates into

217 sex-biased display of glycan epitopes, we analyzed whole worm lysates on lectin microarrays

218 (Pilobello, Krishnamoorthy, et al.; Propher et al.). This technology uses the known glycan  
 219 binding specificities of lectins to provide an epitope-specific readout of glycosylation. We  
 220 observed significant differences in glycosylation profiles between male and female worms  
 221 (**Fig. 4**). Female worms showed higher levels of terminal Gal/GalNAc epitopes, including core  
 222 1 O-glycans and T-antigen (lectins: MPA, MNA-G, HPA, ECA, GS-I, HAA, WFA, MNA-G,  
 223 APP), and higher levels of LacDiNAc (LDN, lectin: SBA) and  $\alpha$ 1,2 fucosylation (TJA-II, PTL-  
 224 II). In contrast, male worms had higher levels of terminal GlcNAc (lectins: WGA,) and  
 225 fucosylated type 2 LacNAc epitopes (AAL).  
 226

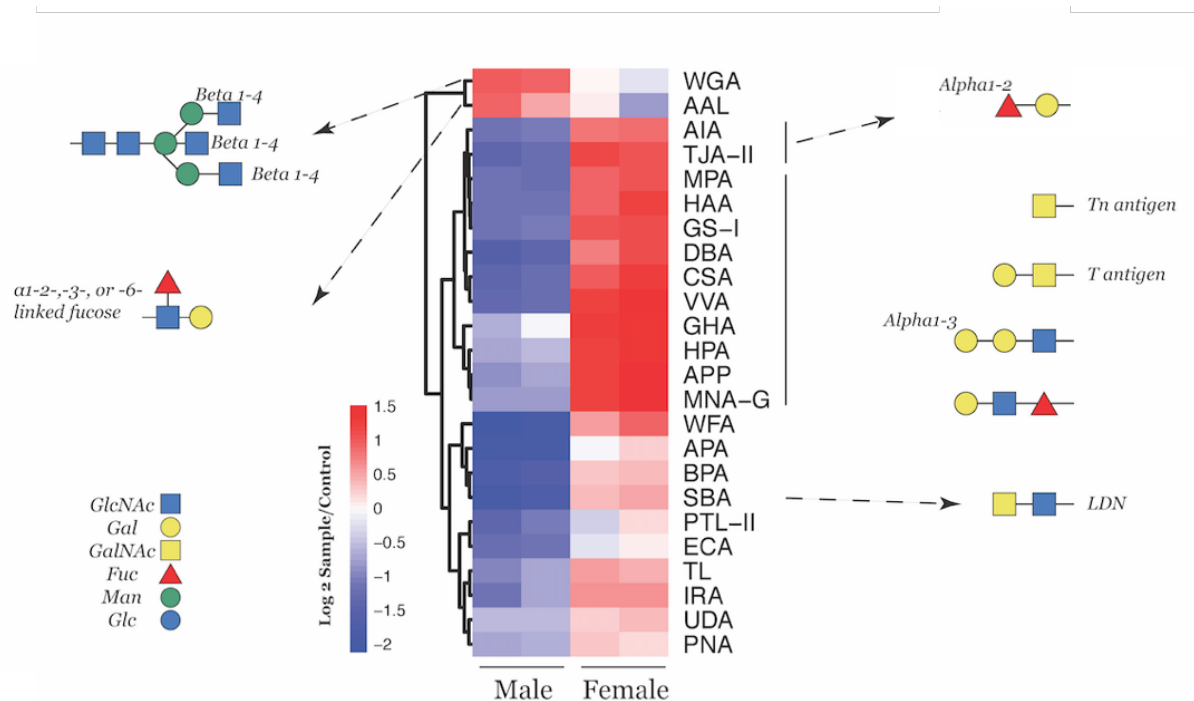

**Figure 4: Glycomic profiling of *B. malayi* as determined by glycan binding to lectin arrays.** Heatmap summarizing lectin array data comparing male and female glycans and representing significantly differentially displayed glycan epitopes between sexes ( $p < 0.05$ ). Data shown represent Log<sub>2</sub> of the fluorescence ratios between each sample and the control. Lectins are grouped by their corresponding recognition epitopes and representative glycan structure displaying respective epitopes are shown.

227 We suspected that biases in glycan epitopes would be associated with differential distribution  
 228 within tissues in male and female worms, especially in the organs involved in secretion and  
 229 excretion. To test this, we determined the spatial localization of fucosylated and/or  
 230 galactosylated proteins in the heads and tails of adult male and female *B. malayi*. We stained

231 worms with both fluorescently tagged AAL lectin, which binds fucosylated LacNAc (enriched  
232 in males) and GS-I lectin, which binds to  $\alpha$ -galactose residues (enriched in females). We  
233 observed a clear localization of fucosylated and galactosylated epitopes within the mouth and  
234 cephalic alae of both males and females consistent with the known distribution of sensory  
235 organs (**Fig. 5A**). Females showed a diffuse body staining with galactose-specific lectin GS-I,  
236 with higher levels at the cuticular areas and within the ovaries, compared to a much lower  
237 intensity of galactose staining across the body of male worms. In contrast, males displayed a  
238 very specific and high intensity fluorescence of fucosylated residues in reproductive organs  
239 and tissues (**Fig. 5B**) coupled to higher levels of fucosylated residues at the mouth and in the  
240 cephalic regions.

241

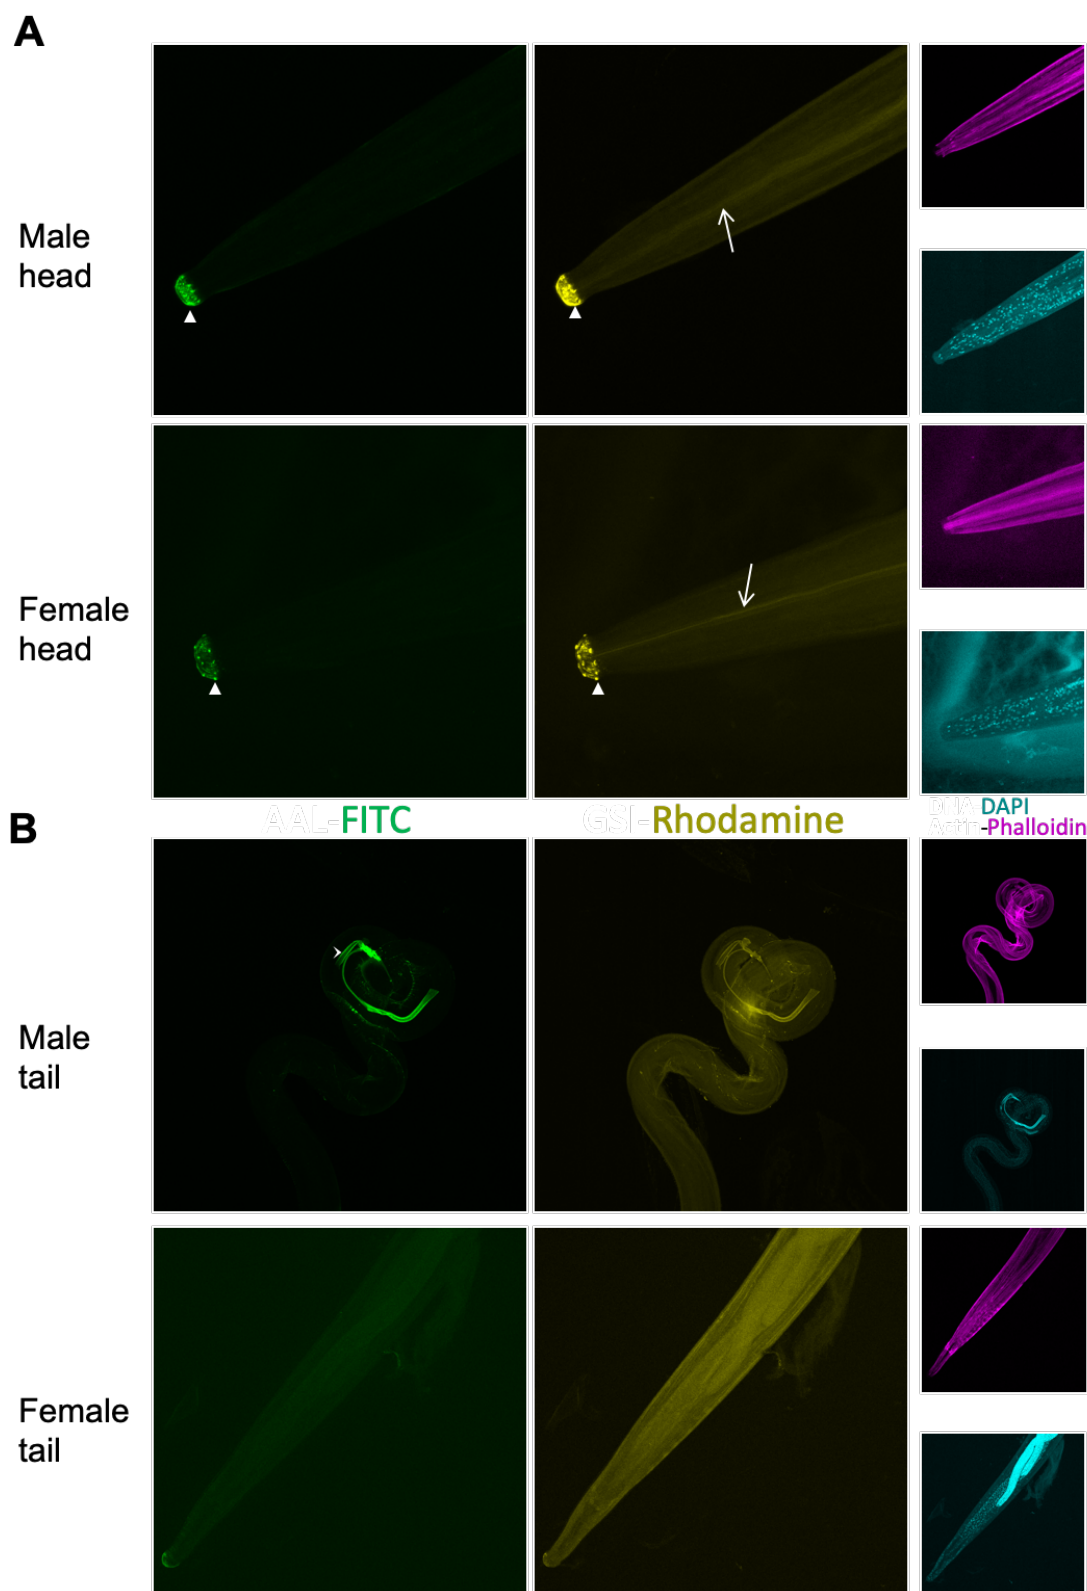

**Figure 5: Fluorescence microscopy of male and female *B. malayi* adult worm heads and tails stained with fluorophore-labeled lectins. A.** Heads of adult male and female worms. **B.** Tails of adult male and female worms. Images show full adult worms fixed in 4% formaldehyde 2:1 in heptane and stained with AAL-FITC for Fucosylated glycan epitopes (Green), GS1-Rhodamine for Galactosylated glycan epitopes (Yellow), Phalloidin for actin (Magenta) and DAPI for DNA (Cyan). Images are taken at 20x magnification for both males and females. Images shown are representative of multiple biological replicates (N=3). Arrow heads point to sensory organs in cephalic regions of both males and females, arrows highlight the intestines of both males and females and the pointy arrow indicates male spicules (reproductive organs).

## 242 **Adult male and female worms differentially glycosylate expressed proteins**

243

244

245 The differential localization of galactosylated and fucosylated residues suggests such  
246 modifications occur on different proteins. To identify the protein partners of the sex-biased  
247 glycan epitopes, we carried out proteomic analysis on glycoproteins isolated with AAL and  
248 GS-I (**Fig. 6A**). Consistent with our findings from the lectin arrays, binding to AAL and GS-I  
249 showed higher affinity to male and female lysates, respectively (**Fig. 4**). Total protein extracts  
250 from both male and female worms were subjected to affinity chromatography on AAL and GS-  
251 I crosslinked columns. Chromatography fractions were checked for quality by silver stained  
252 SDS-PAGE gels (**Supp. Fig. 1**). Eluted proteins and column washes were labeled by tandem  
253 mass tags (TMT) and mass spectrometry analysis was done to identify the significantly  
254 enriched proteins in each fraction.

255 Following statistical analysis and normalization (see Materials and Methods), we identified a  
256 total of 56 unique proteins significantly enriched in the eluate from either columns, out of ~  
257 950 proteins identified by MS/MS (two-way ANOVA,  $p < 0.005$ ) (**Supp. Table S3a**). Of these  
258 proteins, 17 were galactosylated (bound to GS-I) and 32 were fucosylated (bound to AAL) in  
259 male worms, while 16 were galactosylated and only 6 were fucosylated in female worms (**Fig.**  
260 **6B-D; Supp. Table S3b**). Clear sex-specific glycosylation of proteins was observed, with only  
261 3/56 proteins displaying AAL-binding fucosylated epitopes in both sexes. (**Fig. 6F**)

262

263 To further investigate this subset of differentially glycosylated proteins, we profiled them for  
264 GO term enrichments (**Supp. Table S3c**). We observed a significant enrichment in proteins  
265 in the extracellular region ( $p$ -value = 0.0014). This finding, coupled to the detection of Bma-  
266 mif-1, a known immunomodulatory protein at the host-parasite interface, led us to determine  
267 whether these differentially glycosylated proteins were part of the *B. malayi* ES. All 56 detected  
268 proteins were observed in the *B. malayi* secretome defined in this study, suggesting a potential  
269 role for differential glycosylation in parasite glycoprotein-mediated immunomodulation.

270

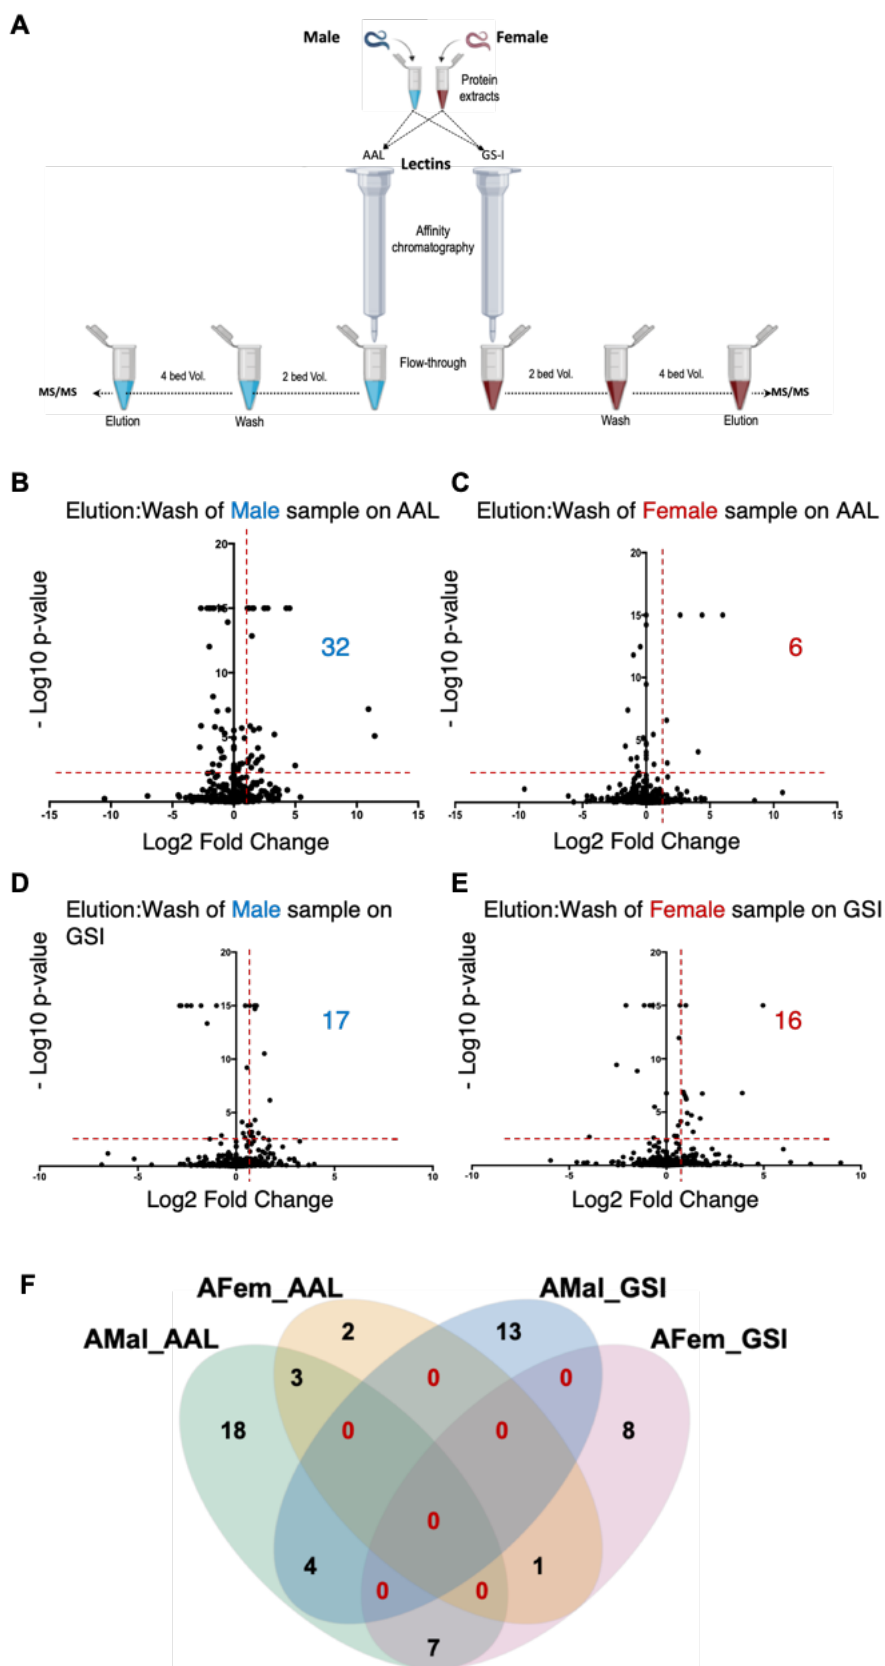

**Figure 6: Mass spectrometry analysis of affinity chromatography fractions and glycoprotein characterization.**

**A.** Schematic diagram representing the experimental approach from total protein extraction to lectin affinity chromatography coupled with MS-MS. **B.** Volcano plot of MS/MS analysis data from full worm male lysate following affinity chromatography with GS1 lectin. **C.** Volcano plot of MS/MS analysis data from full worm female lysate following affinity chromatography with GS1 lectin. **D.** Volcano plot of MS/MS analysis data from full worm male lysate following affinity chromatography with AAL lectin. **E.** Volcano plot of MS/MS analysis data from full worm female lysate following affinity chromatography with AAL lectin. Plots show average Log<sub>2</sub> of Fold Change (FC) of the detected protein intensity between wash and elution fractions across replicas with the corresponding -Log<sub>10</sub> p-values. The total number of significantly eluted proteins from each fraction are shown with p-values <0.005 and at least 2 folds increase. **F.** Venn diagram of the overlap between the identified significantly eluted glycoproteins from both male and female samples on both lectins. Red numbers in the Venn diagram highlight the null intersections.

maAAL: male worm lysate on AAL column. femAAL: Female lysate on AAL column, MaGS1: male lysate on GS1 column, FemGS1: female lysate on GS1 column.

271



272 **Guilt-by-association analysis reveals a cluster of highly secreted differentially**  
273 **glycosylated proteins with potential immune functions**

274

275 Four secreted *B. malayi* proteins have previously been reported to be immunomodulatory:  
276 Bma-mif-1 (Prieto-Lafuente et al.), a macrophage migration inhibitory factor; Bma-far-1 (Zhan  
277 et al.), a fatty acid binding protein with stimulatory effects; Bma-CPI-2 (Manoury et al.), a  
278 cysteine protease inhibitor reported to be immunosuppressive; and the Cofactor Independent  
279 Phosphoglycerate Mutase Bma-IPGM-1 that induces a mixed Th1/Th2 response in the host  
280 (Singh et al.).

281

282 To identify immunomodulatory candidates in *B. malayi*'s secreted proteins, we made use of  
283 the guilt-by-association concept. We mined previously published *B. malayi* stage-specific  
284 transcriptomes for expression profiles of all ES protein coding genes and used dimensionality  
285 reduction (PCA, MDS) to identify genes that have similar expression profiles as the four known  
286 *B. malayi* immunomodulators (CPI2, MIF1, FAR1, and IPGM1). We clustered the results of  
287 both PCA and MDS analyses based on PC1:PC2 and X1:X2, respectively, to identify genes  
288 with the closest expression profile trends across all life stages. We then searched for known  
289 immunomodulators and identified the genes clustering with each of them. Both dimensionality  
290 reduction analyses and clustering (**Supp. Figure 2**) revealed a total of 112 proteins sharing  
291 similar expression profiles as the known immunomodulators, with more than 60% of those  
292 identified by both approaches (**Fig. 7A and Supp. Table S4**).

293 To further shortlist the candidates that are highly expressed and differentially glycosylated by  
294 adult worms, we examined the overlap between the full set of differentially glycosylated  
295 proteins, the full set of *in silico* shortlisted candidates, and the top 50% secreted proteins  
296 detected in adult male and female worms. The analysis identified 16 proteins highly secreted  
297 by both males and females and differentially glycosylated, including three of the known  
298 immunomodulators secreted by *B. malayi*, Bma-MIF-1, Bma-FAR-2 and Bma-IPGM-1 (**Fig.**

299 **7B).** Gene identifiers, RNA expression levels, secreted protein levels, and individual function  
300 annotations for each of the 12 proteins are provided (**Fig. 7C**).

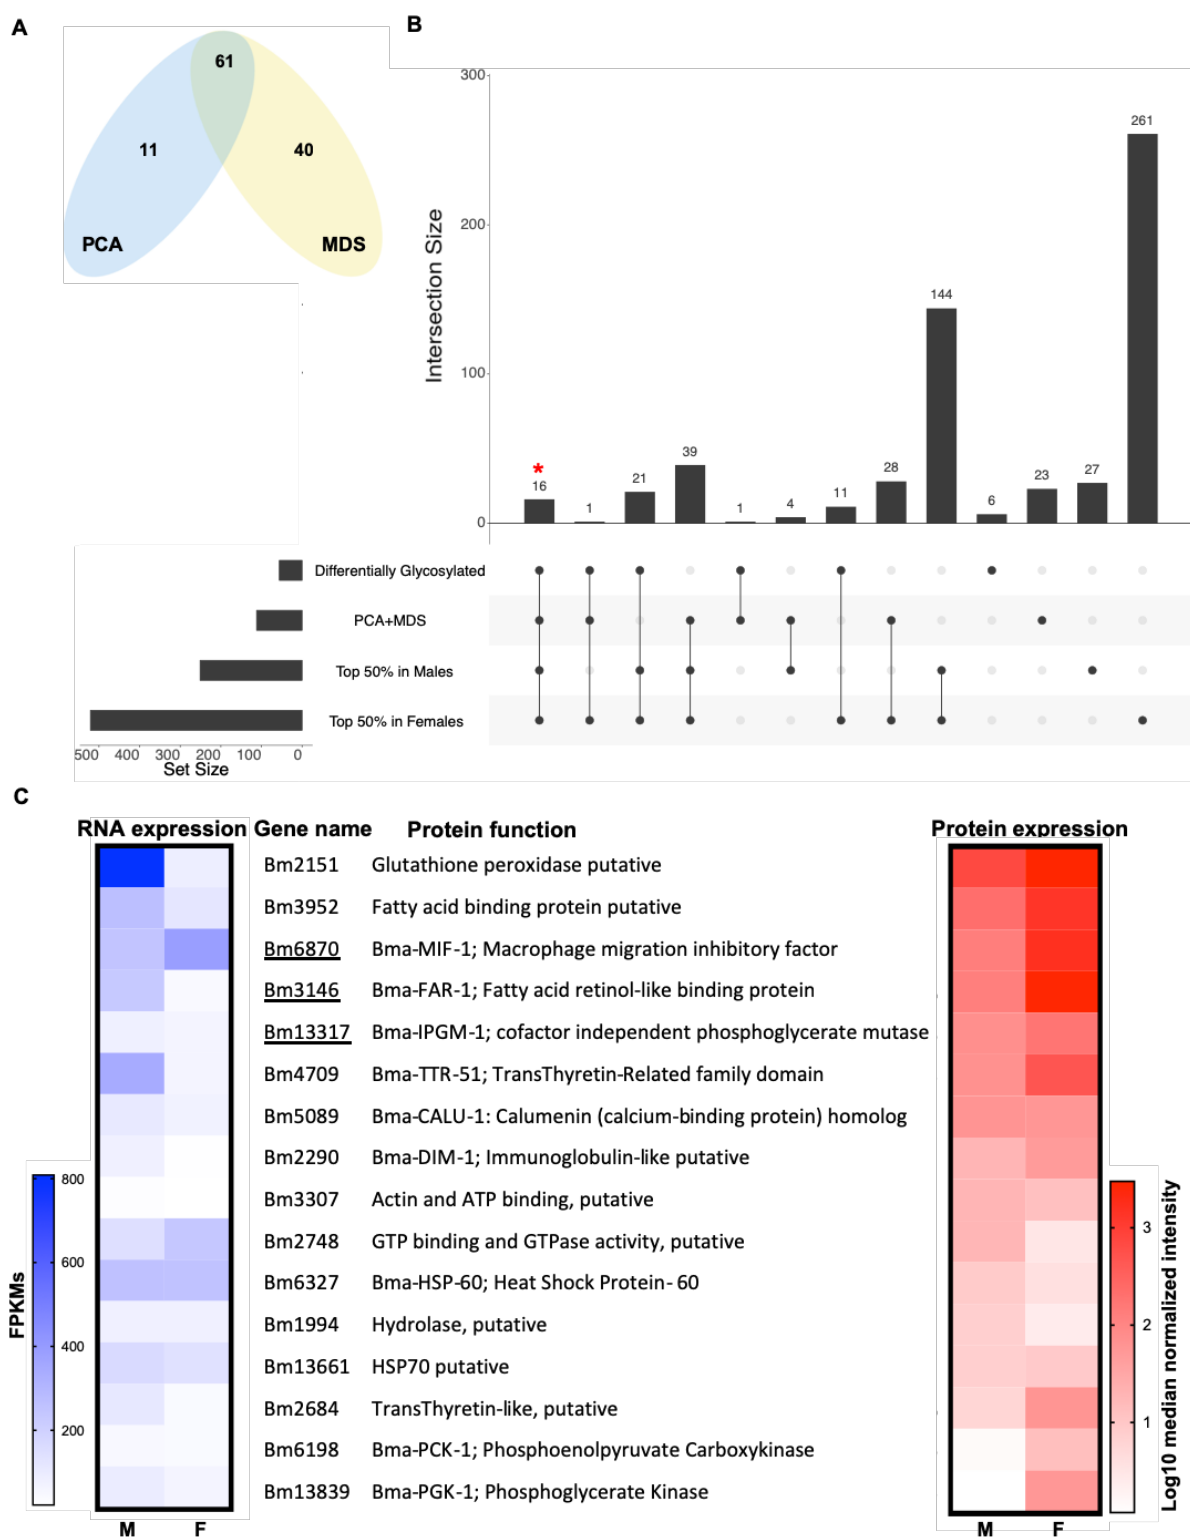

**Figure 7: Immunomodulatory candidate proteins secreted and differentially glycosylated by adult male and female *B. malayi*.** **A.** Venn diagram representing the overlap between immunomodulatory gene clusters following Principal Component Analysis (PCA) and Multi-Dimensional Scaling analysis (MDS) of stage and sex specific secretome transcriptomes. **B.** UpsetR plot representing the intersections across the candidate cluster genes, differentially glycosylated proteins and the top 50% proteins secreted from both Males and Females. **C.** Candidate proteins from intersections highlighted (\*) in **B.** Gene names, protein functions and their corresponding RNA expression and protein intensity levels are shown. Highlighted by an underline are three previously characterized known immunomodulators.

302

## 303 **Discussion**

304

305 Protein glycosylation is an evolutionarily conserved posttranslational modification that plays  
306 an important role in multiple biological processes, from early development to sexual maturity  
307 of many living organisms (Varki, Ajit; Cummings, R. D.; Esko, J. D.; Freeze, H. H.; Stanley,  
308 P.; Bertozzi, C. R.; Hart, G. W.; Etzler and E.). The template-free synthesis of glycans leads  
309 to a large diversity in glycan epitope structures. Several such glycoproteins at the host-  
310 parasite interface in helminthic infections (McSorley et al.; Tundup et al.), including galectins,  
311 are known to regulate host-parasite interactions (Baum et al.; Boscher et al.). Glycoproteins  
312 also play crucial roles in sperm-egg biocommunication as well as immune signaling and  
313 activation (Giovampaola et al.). Characterization of the glycome is therefore an important  
314 component to gain a better understanding of the underlying biology of helminthic parasitism.  
315 In this study, we profiled the glycoproteome of *B. malayi*, a model for filarial parasites. By  
316 analyzing male and female *B. malayi* transcriptomes separately for glycogenome expression,  
317 and experimentally probing their respective glycomes by lectin microarrays, we identified clear  
318 sex biases in glycogenome expression coupled to strikingly different lectin binding profiles  
319 between adult male and female *B. malayi*. The transcriptomic data suggested sex biases in  
320 glycan epitope expression, largely confirmed by lectin arrays.

321 Helminth glycomes are generally rich in oligomannose and paucimannose structures,  
322 extensively fucosylated, including the highly immunoactive  $\alpha$ 1-3 fucosylation, and rich in  
323 GlcNAc and GalNAc residues (Hokke and van Diepen). The lectin binding profiles show that  
324 *B. malayi* is no exception, and additionally uncovers a sex-biased fucosylation of type 2  
325 LacNAc (LN) in males while females favor  $\alpha$ 1-2 fucosylation. Helminthic glycans may be  
326 branched with LacNAc and LacDiNAc residues, or otherwise truncated with simple terminal  
327 GlcNAc or GalNAc. Both *B. malayi* sexes expressed enzymes needed to catalyze the addition  
328 of  $\beta$ 1,3-GalNAc in an O-linked manner to a Ser/Thr site forming the Tn antigen. The Tn antigen

329 is a truncated glycan with terminal GalNac that is mostly known for its correlation with  
330 promoting metastatic colorectal cancers (Liu et al.). A higher affinity to core 1 and Tn-antigen  
331 binding lectins is reported in female worms as compared to male worms. This is partially  
332 explained by the higher expression of the  $\beta$ -1,6-N-Acetylglucosaminyltransferases (Bm3610  
333 and Bm5268) by males, catalyzing further modifications of the Tn epitope to core 2 and core  
334 6 O-glycans. These epitopes are not detected by the core 1 O-glycan binding (AIA, MPA,  
335 MNA-G) and Tn-binding (HAA, HPA) lectins which show enhanced binding to glycoproteins  
336 from female worms.

337

338 To gain a better understanding of the sex bias in glycan epitope display, and identify any  
339 functional implications, we determined the distribution and localization of differentially  
340 expressed glycan epitopes in male and female worms. We observe the specific localization of  
341 galactosylated and fucosylated epitopes in reproductive tissues, sensory organs, intestines  
342 and cuticle. Such localization suggests a role for differential glycosylation in development,  
343 reproduction, and at the host-parasite interface, with sex specificity. To further investigate the  
344 functional implications of this differential glycosylation, we identified the protein partners of  
345 these differentially displayed epitopes. Using lectin affinity chromatography coupled to mass  
346 spectrometry we identified 56 differentially glycosylated proteins fucosylated and/or  
347 galactosylated in a sex-specific manner by *B. malayi*. The overrepresentation of  
348 secreted/excreted proteins amongst the differentially glycosylated proteins is not entirely  
349 unexpected yet the 100% overlap between ES proteins, as characterized in our study, and the  
350 differentially glycosylated proteins, strongly suggests a role for differential glycosylation in  
351 parasite interactions with its host. Substantial overlap with known secreted proteins (60%)  
352 validated the results.

353 The missing proteins identified in other studies (Bennuru et al) but not in our study may be  
354 due to sample variation and technological limitations. Most strikingly, we observed that most  
355 secreted proteins were shared across developmental stages, while previous work reported a

356 stage-specific secretome (Bennuru et al.). This implies that the number of stage-specific  
357 secreted proteins may be much smaller than previously thought.

358 One of the most interesting differentially glycosylated, highly secreted *B. malayi* proteins is the  
359 well characterized Macrophage Migration Inhibitory Factor 1 (MIF1, Bm6870), a known  
360 immunomodulatory protein secreted by *B. malayi* (Prieto-Lafuente et al.) and determined in  
361 our study to be exclusively fucosylated in male worms. Fucosylation has been linked to CD14-  
362 dependent Toll Like Receptor 4 (TLR4) signaling activation (Iijima et al.). LeX, a fucose-  
363 containing glycan epitope, has also been implicated in mediating endocytosis of parasite  
364 glycoproteins to reach their effector sites. We hypothesize that fucosylation of MIF1 serves to  
365 decrease the immunogenicity of the parasite protein enhancing its suppressive function, or  
366 alternatively fucosylation may facilitate a higher internalization of the protein, similarly  
367 enhancing its suppressive function. An equally interesting differentially glycosylated protein is  
368 Bma-IPGM-1, previously shown to induce a mixed immune response, and which we showed  
369 displays a male-specific fucosylation coupled to female-specific galactosylation. These two  
370 well characterized *B. malayi* immunomodulators are joined by a third immunomodulatory  
371 protein Bma-FAR-1; two newly suggested drug targets, Bm5089 and Bm13839; and a subset  
372 of Heat Shock Proteins, Transthyretin-like proteins and a fatty-acid binding protein—all of  
373 which are part of protein families associated with host immunomodulation in helminthic  
374 infections, emphasizing possible sex-specific roles for *B. malayi* worms in the interactions with  
375 their hosts.

376

## 377 **Conclusion**

378 In this study we show that adult male *B. malayi* preferentially display higher levels of fucose,  
379 localize the bulk of fucosylated and galactosylated glycoproteins to highly metabolically active  
380 internal and external reproductive organs, and differentially glycosylate secreted and immune-  
381 relevant proteins. Adult females favor  $\alpha$ 1-2 fucosylation (previously reported to play key roles  
382 in sperm-egg biocommunication), extensively galactosylate proteins, and localize the bulk of  
383 fucosylated and galactosylated glycoproteins to the intestines and secretory/excretory path

384 with a clear signal from the anal pore and esophagus. Considering the respective localizations  
385 of fucosylated and galactosylated glycoproteins, and the differential glycosylation of secreted  
386 immunomodulatory and immune-relevant proteins, the data suggest that adult male and  
387 female *B. malayi* worms may be modulating the host immune response in sex-specific  
388 mechanisms and pathways. However, it remains to be determined if differential glycosylation  
389 of secreted proteins alters their effect on host cells. The immune potential of recombinantly  
390 expressed proteins with no glycosylation should first be established. The custom glycosylation  
391 of these recombinantly expressed proteins, if feasible, could help elucidate the functional  
392 implications of sex-dependent glycosylation of secreted proteins in *B. malayi*.

393

394

## 395 **Materials and Methods**

396

### 397 **Worm culture and processing of the collected secretome**

398

399 All *B. malayi* worms in this study were provided by the NIH/NIAID Filariasis Research Reagent  
400 Resource Center for distribution through BEI Resources, NIAID, NIH. A total of 30 adult males,  
401 30 adult females, 300 L3, 300 L4 and  $2 \times 10^6$  microfilariae (mf) were used to characterize their  
402 respective secretomes. Adults were cultured in pairs at 1 worm/ml of RPMI1600 supplemented  
403 with 2% glucose. L3, L4 and mf were cultured in bulk in 5ml of RPMI1600 with 2% glucose.  
404 Spent media for all cultures was collected every 24hrs and filtered through 0.22 $\mu$  filters,  
405 aliquoted and snap-frozen in an ethanol/dry ice bath. Collection of spent media was done for  
406 7 days and combined aliquots were then concentrated 100x using Amicon Ultra15 with a 3Kda  
407 cutoff (cat# UFC900324) and buffer exchanged into cold sterile PBS, at pH 7.4. Concentrated  
408 samples were further split into 5 equal 100  $\mu$ l fractions and methanol-chloroform precipitation  
409 of proteins was performed. Briefly, 400  $\mu$ l of methanol was added to each 100  $\mu$ l of protein  
410 sample and a subsequent 100  $\mu$ l of chloroform was added on top. The mixture was then briefly  
411 vortexed and 300  $\mu$ l of DI water added. Samples were then centrifuged at 13,000 rpm for 15

412 mins. Tubes were left at room temperature for another 15 mins to achieve a clear phase  
413 separation. The top layer was carefully removed leaving 50  $\mu$ l of liquid. 400 $\mu$ l of methanol  
414 were then added and tubes tapped to induce mixing of phases. Samples were centrifuged as  
415 before, and the methanol wash step was repeated twice. Tubes were subjected to speed  
416 vacuum to evaporate all liquids and the resulting pellets were resolubilized using RapiGest SF  
417 Surfactant according to manufacturer's protocol with a final concentration of 0.1% (RapiGest  
418 SF, 1 mg, 1/pk Part Number: 186001860). Samples were combined and analyzed by Mass  
419 Spectrometry.

420

421

## 422 **Glycogenome characterization and ortholog analysis**

423

424 The full genome of *B. malayi* was downloaded from WormBase in 2018 and identified as  
425 B\_malayi-4.0 assembly (Harris et al.).

426 Functional annotation: GO annotation of the genome was done using BLAST2GO v1.3.0 (Gö  
427 Tz et al.). A full list of protein glycosylation related GO terms was then obtained through the  
428 GO commission and can be found in **Supp. Table S5a**. The genome was filtered for genes  
429 associated with any of the glycosylation GO terms. A full list of 135 genes was identified and  
430 can be found in **Supp. Table S5b**. A similar analysis was done with the genome using the  
431 KEGG database (Kanehisa et al.) and all protein glycosylation related pathways can be found  
432 in **Supp. Table S5c**. Subsequently old gene identifiers from KEGG were assigned to the new  
433 IDs using BioMart for conversion (Smedley et al.). A total of 112 genes were found and are  
434 listed in **Supp. Table S5d**. To complement the functional analysis, *B. malayi*'s genome was  
435 analyzed using HMMER (Potter et al.) to annotate all Pfam domains. The full results are shown  
436 in **Supp. Table S5e**. Pfam annotations related to protein glycosylation were extracted from  
437 the Pfam database (Finn et al.); annotated genes can be found in **Supp. Table S5f**.

438



439 BLASTp analysis: A full list of glycosylation related proteins in human was extracted from  
440 Uniprot (D506-D515) and is shown in **Supp. Table S5g**. BLASTp was used to interrogate the  
441 whole *B. malayi* proteome against the compiled “glycosylation proteome”. Multiple blast hits  
442 were allowed and filtered for a maximum e-value of 0.05. All hits with at least 50% sequence  
443 identity were considered true and **Supp. Table S5h** includes all data from the Blastp analysis.  
444 Subsequently, hits with identity scores between 20-50% were further cross-checked against  
445 KEGG, GO and Pfam outcomes and hits present in at least one of the functional annotations  
446 were added. **Supp. Table S5i** shows a compiled list of unique genes per approach and the  
447 overall unique list.

448

449 Ortholog analysis: To evaluate the conservation of all glycogenes across several other  
450 nematode genomes, Biomart (Smedley et al.) was used and all available genome projects for  
451 the following organisms were selected and analyzed for orthologs and their percentage  
452 identity. Organisms selected were *Homo sapiens*, *C. elegans*, *F. hepatica*, *T. suis*, *O. volvulus*,  
453 *S. mansoni*, *D. immitis*, *W. bancrofti*, *B. pahangi*, *A. vitea* and *L. loa*. Full data are shown in  
454 **Supp. Table S5j**.

455

456

## 457 **Transcriptome sequencing and analysis**

458

459 Lists of differentially expressed genes for male and female *B. malayi* were downloaded from  
460 (Grote et al.) and further filtered for glycogenome expression; **Supp. Table S2b** represents  
461 the full list of significantly differentially expressed glycosylation genes between adult male and  
462 female worms with corresponding functions. For dimensionality reduction, FPKM values used  
463 were generated as follows: BAM files were used with Cufflinks (v2.2.1) (Roberts et al.;  
464 Trapnell, Hendrickson, et al.; Trapnell, Williams, et al.) to obtain fragments per kilobase of  
465 exon per million fragments mapped (FPKM) for each of the annotated transcripts and with  
466 Cuffnorm (Roberts et al.; Trapnell, Hendrickson, et al.; Trapnell, Williams, et al.) to obtain

467 normalized FPKMs by library size. Data was filtered for secretome-coding genes as identified  
468 by our analysis. ClustVis (v1.0) (Metsalu and Vilo) was used for Principal Component Analysis  
469 and R was used to do Multi-Dimensional Scaling. PC1, PC2 and X1, X2 were then used for  
470 unsupervised clustering and plotting using the pHeatmap R package ([https://cran.r-](https://cran.r-project.org/package=pheatmap)  
471 [project.org/package=pheatmap](https://cran.r-project.org/package=pheatmap), v 1.0.10).

472

473

#### 474 **Protein extractions from male and female *B. malayi* adult worms**

475

476 Protein extractions from both male and female worms were done by cryogenic grinding and  
477 PBS extraction. Briefly, worms were ground for 2 cycles of 10 mins in liquid N<sub>2</sub> with 100 µl of  
478 PBS. The white powder was recovered and left to sit on ice until melted. Samples were then  
479 diluted 1:1 PBS and left overnight on an end-to-end rotator at 4°C. The samples were  
480 centrifuged for 15 mins at 13,200 rpm at 4°C. Supernatants were collected, quantified and  
481 aliquoted for further use. A total of 500 male worms and 200 female worms were used, split  
482 into two batches for biological replication.

483

484

#### 485 **Lectin arrays**

486

487 Lectin microarrays were generated as previously described (Pilobello, Krishnamoorthy, et al.).  
488 Briefly, arrays were manufactured in-house with a Nano-plotter v2.0 piezoelectric non-contact  
489 array printer (GeSiM) using a nano A-J tip. They were printed on Nexterion Slide H (Schott  
490 Nexterion) under 50% relative humidity at a surface temperature of 12°C. Commercial lectins  
491 and antibodies were purchased from Vector Labs, R&D Systems, Santa Cruz, TCI, AbCam,  
492 E.Y. Labs, or Sigma-Aldrich. The recombinant lectins rGRFT, rCVN, and rSVN were generous  
493 gifts from Dr. B. O'Keefe (NCI Frederick). A list of all printed lectins can be found in **Supp.**  
494 **Table S6a**. We note that we are unable to observe a subset of epitopes (e.g.  $\alpha$  2,8-linked

495 sialic acids) in our array. Prior to sample hybridization, lectin microarray slides were blocked  
496 for 1 h with 50 mM ethanolamine in 50 mM sodium borate buffer (pH 8.8) and washed three  
497 times with 0.005% PBS-T (pH 7.4). Sample protein concentration and the degree of  
498 fluorescent label incorporation was determined by measuring absorbances at 280, 555, and  
499 650 nm per the manufacturer's instructions on a NanoDrop ND-2000c spectrophotometer  
500 (Thermo Scientific). A total of 5 µg of proteins per sample and contrasting labeled reference  
501 were mixed in 0.005% PBS-T (pH 7.4) for a final concentration of 100 ng/µL of protein. For  
502 reference, an equimolar mixture of all samples assayed was used. Slides were then loaded  
503 into a hybridization cassette (Arrayit) to isolate individual arrays (24 per slide). Samples were  
504 loaded onto individual arrays with a control array for the reference vs reference sample.  
505 Labeled protein samples were hybridized for 2 h at 25°C with gentle agitation. Following  
506 hybridization, samples were removed and arrays washed 4 times with 0.005% PBS-T (pH 7.4)  
507 for 10 minutes each. Slides were removed, submerged in ddH<sub>2</sub>O, and spun dry. Arrays were  
508 scanned using a GenePix 4300A array scanner (PMT 550 laser power 100% for both  
509 fluorescent channels). Background-subtracted median fluorescence intensities were extracted  
510 using GenePix Pro v7.2. Nonactive lectins were defined as having an average of both channel  
511 SNRs 90% of the data and removed prior to further analysis. Data were median-normalized  
512 in each fluorescent channel and the log<sub>2</sub> of the sample/reference ratio was calculated for each  
513 technical replicate for each lectin. Technical replicates were then averaged for each lectin  
514 within each array. To identify significantly overrepresented glycan epitopes in male and female  
515 worms, a two-way ANOVA was done on the outcome of the lectin arrays and significant lectins  
516 and corresponding binding epitopes can be found in **Supp. Table S6b**.

517

518

### 519 **Lectin affinity chromatography**

520

521 AAL and GSI lectins crosslinked to agarose beads were acquired from Vector lab (Cat# AL-  
522 1393-2), and EY lab (Cat# AK-2401-2) and packed into chromatography columns.

523 Chromatography columns were used as per the manufacturer's protocol. Briefly, columns  
524 were washed with 1.4M NaCl solution prior to use and re-equilibrated with PBS pH=7.4 before  
525 use. Samples were applied to the columns and flow-throughs collected by gravity flow.  
526 Columns were washed with 2 bed volumes of PBS and wash fractions were collected. Elution  
527 was done in 4 bed volumes with corresponding elution buffers (Glycoprotein Eluting Solution,  
528 Cat. No. ES-3100 Vector labs for AAL column and 0.1M Melibiose monohydrate for GSI Cat#  
529 AK-2401-2). Eluted samples were further concentrated using Amicon Ultra15 3Kda (Cat#  
530 UFC900324) to a final volume of 500 $\mu$ L (10x concentration). Elution buffer was exchanged to  
531 sterile cold PBS pH=7.4 and samples were aliquoted and stored for further use. Progression  
532 and quality of the chromatographies were assessed by SDS-PAGE silver-stained gels using  
533 Pierce<sup>™</sup> Silver staining kit (ThermoFisher Scientific Cat# 24612) and standard 15% resolving  
534 gel 30:1 Polyacrylamide: Bis acrylamide denaturing gels. Gels were run for 1.5 hrs at 90V in  
535 1x Tris-Glycine-SDS and Precision Plus Protein<sup>™</sup> Kaleidoscope<sup>™</sup> Prestained Protein  
536 Standards #1610375 was used for reference.

537

538

### 539 **Mass spectrometry analyses**

540

541 To identify the proteins pulled down by the respective lectins, the last wash and the elution  
542 samples of each of the affinity chromatographies were subjected to mass spectrometry  
543 analysis. Similarly, we also analyzed resolubilized secretome samples. Samples were  
544 prepared as follows: Briefly, we denatured the proteins by heating for 15 min at 90°C. We  
545 added 1 $\mu$ g of mass spectrometry grade trypsin (Sigma Aldrich) and digested the proteins into  
546 peptides at 37°C overnight. For glycofractions, we measured resulting peptide concentrations  
547 with the Pierce Quantitative Fluorometric Peptide Assay (ThermoFisher, #90110); this step  
548 was not performed for the secretome samples. The glycofractions were labeled using  
549 TMT10plex Isobaric Label Reagent (ThermoFisher) while secretome samples were subjected  
550 to label-free analysis. The salt removal for both experiments was performed using Pierce<sup>™</sup>

551 C18 Spin Tips (Thermo Scientific, #84850) per manufacturer's instructions. For both  
552 experiments, we used an EASY-nLC 1000 coupled on-line to a q-Exactive HF spectrometer  
553 (both Thermo Fisher Scientific). Buffer A (0.1% FA in water) and buffer B (80% acetonitrile,  
554 0.5% acetic acid) were used as mobile phases for gradient separation. Separation was  
555 performed using a 50 cm x 75  $\mu$ m i.d. PepMap C18 column (Thermo Fisher Scientific) packed  
556 with 2  $\mu$ m, 100 Å particles and heated at 55°C. We used a 155 min segmented gradient of  
557 0.1% FA (solvent A) and 80% ACN 0.1% FA (solvent B) at a flow rate of 250 nl/min as follows:  
558 2 to 5 %B for 5 min, 5 to 25 %B for 110 min, 25-40 % B for 25 min, 49-80 % B for 5 min and  
559 80-95% B for 5 min. Solvent B was held at 95% for another 5 min.

560 For label-free analysis of the secretome, the full MS scans were acquired with a resolution of  
561 120,000, an AGC target of  $3 \times 10^6$ , with a maximum ion time of 100 ms, and scan range of  
562 375 to 1500 m/z. Following each full MS scan, data-dependent high-resolution HCD MS/MS  
563 spectra were acquired with a resolution of 30,000, AGC target of  $2 \times 10^5$ , maximum ion time of  
564 150 ms, 1.5 m/z isolation window, fixed first mass of 100 m/z and NCE of 27 with centroid  
565 mode.

566 For the TMT labeled samples of the glycofractions, the full MS scans were acquired with a  
567 resolution of 120,000, an AGC target of  $3 \times 10^6$ , with a maximum ion time of 100 ms, and scan  
568 range of 375 to 1500 m/z. Following each full MS scan, data-dependent high-resolution HCD  
569 MS/MS spectra were acquired with a resolution of 60,000, AGC target of  $2 \times 10^5$ , maximum ion  
570 time of 100 ms, 1.2 m/z isolation window, fixed first mass of 100 m/z and NCE of 35 with  
571 centroid mode.

572 The RAW data files were processed using MaxQuant (version 1.6.1.0) to identify and quantify  
573 protein and peptide abundances. The spectra were matched against the *Brugia malayi* Uniprot  
574 database (downloaded August 18, 2018) with standard settings for peptide and protein  
575 identification, that allowed for 10 ppm tolerance, a posterior global false discovery rate (FDR)  
576 of 1% based on the reverse sequence of the mouse FASTA file, and up to two missed trypsin  
577 cleavages. We estimated protein abundance using iBAQ 3 for label-free experiments.

578 TMT labeled data was then filtered for proteins recovered only in both replicas for each sample  
579 type. Data is shown in **Supp. Table S3a**. Ratios of Elution:Wash and Wash:Elution were  
580 calculated for each detected protein by sample. Two-way ANOVA was performed using Prism  
581 v7 to identify significantly pulled down proteins in the eluted fractions as compared to their  
582 wash counterparts. An adjusted p-value cutoff of 0.05 and a minimum 2-fold change was used  
583 and a list of significantly eluted proteins can be found in **Supp. Table S3b**.

584 Label-free data relevant to stage and sex-specific secretomes were normalized by total  
585 intensities and median normalized by sample. Raw IBAQ values for all replicates and proteins  
586 are available in **Supp. Table S1a**.

587

588

#### 589 **Lectin staining and confocal microscopy**

590

591 Adult male and female worms were individually washed in PBS in a 12-well plate with 1ml of  
592 PBS per well. Worms were fixed and permeabilized in 4% paraformaldehyde 2:1 in heptane  
593 and left on high intensity shaking for 30 mins at room temperature. Fixed worms were washed  
594 three times in PBS for 5 mins and transferred to new 12-well plates with 1ml per well of 1x  
595 Phalloidin-iFluor 647 Reagent (Abcam cat# ab176759) in PBS pH=7.4 for 90 mins at room  
596 temperature with moderate shaking. Worms were washed in PBS three times for 5 mins and  
597 transferred to new 12 well plates with 1ml of Fluorescein labeled Aleuria Aurantia Lectin  
598 (Vector labs cat# FL-1391) and Rhodamine labeled Griffonia Simplicifolia Lectin I (Vector labs  
599 cat# RL-1102) in PBS pH7.4 with 0.2mM CaCl<sub>2</sub> at 10 µg/ml final concentrations for both  
600 labeled lectins. Plates were left at 4<sup>0</sup>C overnight on moderate shaking and following that  
601 washed three times in PBS and transferred to new 12-well plates with fresh PBS. Unstained  
602 controls were processed similarly without the addition of the labeled lectins. Stained and  
603 control worms were mounted on microscopy slides in VECTASHIELD® Hardset™ Antifade  
604 Mounting Medium with DAPI (Vector labs cat# H-1500) and left for 30 mins at room  
605 temperature before storing at 4<sup>0</sup>C until imaging.

606 All worms were imaged using a LSM Zeiss 880 confocal microscope with 20X air objective  
607 using the following settings: 1024 x 1024 pixels with 1.0  $\mu\text{m}$  z stack step size, 8bit, 1.3 zoom.  
608 High magnification cut-outs were imaged using the 100X oil objective using 0.29  $\mu\text{m}$  z stack  
609 step size and all other settings identical. Laser power was set at 1.2% (405nm), 2% (488nm),  
610 2% (561nm), 4% (633nm). All tracks were imaged separately to minimize signal crosstalk.  
611 Projections were constructed using the ZEN2012 software with the “Maximum Intensity  
612 Projection” processing option. High magnification pictures were additionally filtered using the  
613 “Median Filter” processing option with x/y kernel size set at 3 voxels.

614

#### 615 **Data Access**

616 All raw glycomics data are made publicly available and can be found at  
617 doi:10.7303/syn24862046. The mass spectrometry proteomics data have been deposited to  
618 the ProteomeXchange Consortium via the PRIDE partner repository with the dataset identifier  
619 PXD024252.

620

621

#### 622 **Acknowledgments**

623 The authors would like to thank the NYUAD global PhD fellowship fund and the NYU Abu  
624 Dhabi Faculty Research Fund AD060 for supporting this work. This research was supported  
625 by funding from the Canada Excellence Research Chairs Program (LM). This work was also  
626 supported in part by the Division of Intramural Research (DIR) of the NIAID/NIH (EG).

627

628

629

630

631

632

633





635 **References**

- 636 Agrawal, Praveen, et al. "A Systems Biology Approach Identifies FUT8 as a Driver of  
637 Melanoma Metastasis." *Cancer Cell*, vol. 31, no. 6, Cell Press, June 2017, pp. 804-  
638 819.e7, doi:10.1016/j.ccell.2017.05.007.
- 639 Ahmed, Umul Kulthum, et al. "The Carbohydrate-Linked Phosphorylcholine of the Parasitic  
640 Nematode Product ES-62 Modulates Complement Activation." *Journal of Biological  
641 Chemistry*, vol. 291, no. 22, 2016, pp. 11939–53, doi:10.1074/jbc.M115.702746.
- 642 Baum, Linda G., et al. "Microbe-Host Interactions Are Positively and Negatively Regulated  
643 by Galectin-Glycan Interactions." *Frontiers in Immunology*, vol. 5, no. JUN, Frontiers  
644 Research Foundation, 2014, doi:10.3389/fimmu.2014.00284.
- 645 Bennuru, Sasisekhar, et al. "Brugia Malayi Excreted/Secreted Proteins at the Host/Parasite  
646 Interface: Stage- and Gender-Specific Proteomic Profiling." *PLoS Neglected Tropical  
647 Diseases*, vol. 3, no. 4, 2009, doi:10.1371/journal.pntd.0000410.
- 648 Boscher, Cecile, et al. "Glycosylation, Galectins and Cellular Signaling." *Current Opinion in  
649 Cell Biology*, vol. 23, no. 4, Elsevier Current Trends, 1 Aug. 2011, pp. 383–92,  
650 doi:10.1016/j.ceb.2011.05.001.
- 651 Choi, Tae-Woo, et al. "Novel Findings of Anti-Filarial Drug Target and Structure-Based  
652 Virtual Screening for Drug Discovery." *International Journal of Molecular Sciences*, vol.  
653 19, no. 11, MDPI AG, Nov. 2018, p. 3579, doi:10.3390/ijms19113579.
- 654 Cvetkovic, Jelena, et al. "Glycans Expressed on Trichinella Spiralis Excretory-Secretory  
655 Antigens Are Important for Anti-Inflammatory Immune Response Polarization."  
656 *Comparative Immunology, Microbiology and Infectious Diseases*, vol. 37, no. 5–6,  
657 Elsevier Ltd, 2014, pp. 355–67, doi:10.1016/j.cimid.2014.10.004.
- 658 D506-D515. "UniProt: A Worldwide Hub of Protein Knowledge The UniProt Consortium."  
659 *Nucleic Acids Research*, vol. 47, 2019, doi:10.1093/nar/gky1049.
- 660 Finn, Robert D., et al. "The Pfam Protein Families Database: Towards a More Sustainable  
661 Future." *Nucleic Acids Research*, vol. 44, no. D1, Oxford University Press, Jan. 2016,  
662 pp. D279–85, doi:10.1093/nar/gkv1344.

- 663 Gemmill, Alan W., et al. "HOST IMMUNE STATUS DETERMINES SEXUALITY IN A  
664 PARASITIC NEMATODE." *Evolution*, vol. 51, no. 2, Society for the Study of Evolution,  
665 Apr. 1997, pp. 393–401, doi:10.1111/j.1558-5646.1997.tb02426.x.
- 666 Giovampaola, Cinzia Della, et al. "Alpha (1,2) Fucosylated Glycoepitopes from Invertebrates  
667 to Humans." *Research & Reviews: Journal of Zoological Sciences*, vol. 4, no. 3,  
668 Research and Reviews, Nov. 2016, pp. 42–49, [http://www.rroj.com/open-access/alpha-  
669 12-fucosylated-glycoepitopes-from-invertebrates-to-humans-.php?aid=84338](http://www.rroj.com/open-access/alpha-12-fucosylated-glycoepitopes-from-invertebrates-to-humans-.php?aid=84338).
- 670 Gö Tz, Stefan, et al. "High-Throughput Functional Annotation and Data Mining with the  
671 Blast2GO Suite." *Nucleic Acids Research*, vol. 36, no. 10, 2008, pp. 3420–35,  
672 doi:10.1093/nar/gkn176.
- 673 Grote, Alexandra, et al. "Defining *Brugia Malayi* and *Wolbachia* Symbiosis by Stage-Specific  
674 Dual RNA-Seq." *PLoS Neglected Tropical Diseases*, vol. 11, no. 3, Public Library of  
675 Science, Mar. 2017, doi:10.1371/journal.pntd.0005357.
- 676 Harischandra, Hiruni, et al. "Profiling Extracellular Vesicle Release by the Filarial Nematode  
677 *Brugia Malayi* Reveals Sex-Specific Differences in Cargo and a Sensitivity to  
678 Ivermectin." *PLoS Neglected Tropical Diseases*, vol. 12, no. 4, Public Library of  
679 Science, Apr. 2018, p. e0006438, doi:10.1371/journal.pntd.0006438.
- 680 Harn, Donald A., et al. "Modulation of Host Immune Responses by Helminth Glycans."  
681 *Immunological Reviews*, vol. 230, no. 1, 2009, pp. 247–57, doi:10.1111/j.1600-  
682 065X.2009.00799.x.
- 683 Harris, Todd W., et al. "WormBase: A Modern Model Organism Information Resource."  
684 *Nucleic Acids Research*, vol. 48, 2020, doi:10.1093/nar/gkz920.
- 685 Heindel, Daniel W., et al. "Glycomic Analysis of Host Response Reveals High Mannose as a  
686 Key Mediator of Influenza Severity." *Proceedings of the National Academy of Sciences  
687 of the United States of America*, vol. 117, no. 43, National Academy of Sciences, Oct.  
688 2020, pp. 26926–35, doi:10.1073/pnas.2008203117.
- 689 Hewitson, James P., et al. "The Secretome of the Filarial Parasite, *Brugia Malayi*: Proteomic  
690 Profile of Adult Excretory-Secretory Products." *Molecular and Biochemical Parasitology*,

- 691 vol. 160, no. 1, Elsevier, July 2008, pp. 8–21, doi:10.1016/j.molbiopara.2008.02.007.
- 692 Hokke, Cornelis H., and Angela van Diepen. “Helminth Glycomics – Glycan Repertoires and  
693 Host-Parasite Interactions.” *Molecular and Biochemical Parasitology*, vol. 215, Elsevier  
694 B.V., July 2017, pp. 47–57, doi:10.1016/j.molbiopara.2016.12.001.
- 695 Iijima, Junko, et al. “Core Fucose Is Critical for CD14-Dependent Toll-like Receptor 4  
696 Signaling.” *Glycobiology*, vol. 27, no. 11, 2017, pp. 1006–15,  
697 doi:10.1093/glycob/cwx075.
- 698 Jiang, Daojun, Ben Wen Li, et al. “Localization of Gender-Regulated Gene Expression in the  
699 Filarial Nematode *Brugia Malayi*.” *International Journal for Parasitology*, vol. 38, no. 5,  
700 Pergamon, Apr. 2008, pp. 503–12, doi:10.1016/j.ijpara.2007.09.010.
- 701 Jiang, Daojun, James Malone, et al. “Multiplex Proteomics Analysis of Gender-Associated  
702 Proteins in *Brugia Malayi*.” *International Journal for Parasitology*, vol. 42, no. 9, Aug.  
703 2012, pp. 841–50, doi:10.1016/j.ijpara.2012.06.004.
- 704 Jiménez-Castells, Carmen, et al. “Gender and Developmental Specific N-Glycomes of the  
705 Porcine Parasite *Oesophagostomum Dentatum*.” *Biochimica et Biophysica Acta (BBA) -  
706 General Subjects*, vol. 1861, no. 2, Elsevier, Feb. 2017, pp. 418–30,  
707 doi:10.1016/J.BBAGEN.2016.10.011.
- 708 Kanehisa, Minoru, et al. “New Approach for Understanding Genome Variations in KEGG.”  
709 *Nucleic Acids Research*, vol. 47, 2019, doi:10.1093/nar/gky962.
- 710 Kashyap, Sudhanva S., et al. “Emodepside Has Sex-Dependent Immobilizing Effects on  
711 Adult *Brugia Malayi* Due to a Differentially Spliced Binding Pocket in the RCK1 Region  
712 of the SLO-1 K Channel.” *PLoS Pathogens*, vol. 15, no. 9, Public Library of Science,  
713 2019, doi:10.1371/journal.ppat.1008041.
- 714 Kaushal, Nuzhat A., et al. “*Brugia Malayi*: Stage-Specific Expression of Carbohydrates  
715 Containing N-Acetyl-d-Glucosamine on the Sheathed Surfaces of Microfilariae.”  
716 *Experimental Parasitology*, vol. 58, no. 2, 1984, pp. 182–87, doi:10.1016/0014-  
717 4894(84)90033-X.
- 718 Khoo, K. H., and Anne Dell. “Glycoconjugates from Parasitic Helminths: Structure Diversity

- 719 and Immunobiological Implications.” *Adv Exp Med Biol*, vol. 491, 2001, pp. 185–205,  
720 doi:10.1007/978-1-4615-1267-7\_14.
- 721 Kumar, Ranjeet, et al. “Characterization of Filarial Phosphoglycerate Kinase.” *Biochimie*, vol.  
722 165, Elsevier B.V., Oct. 2019, pp. 258–66, doi:10.1016/j.biochi.2019.08.012.
- 723 Liu, Zhe, et al. “Tn Antigen Promotes Human Colorectal Cancer Metastasis via H-Ras  
724 Mediated Epithelial-Mesenchymal Transition Activation.” *Journal of Cellular and  
725 Molecular Medicine*, vol. 23, no. 3, Blackwell Publishing Inc., Mar. 2019, pp. 2083–92,  
726 doi:10.1111/jcmm.14117.
- 727 Manoury, Bénédicte, et al. “Bm-CPI-2, a Cystatin Homolog Secreted by the Filarial Parasite  
728 *Brugia Malayi*, Inhibits Class II MHC-Restricted Antigen Processing.” *Current Biology*,  
729 vol. 11, no. 6, Cell Press, Mar. 2001, pp. 447–51, doi:10.1016/S0960-9822(01)00118-X.
- 730 McSorley, Henry J., et al. “Immunomodulation by Helminth Parasites: Defining Mechanisms  
731 and Mediators.” *International Journal for Parasitology*, vol. 43, no. 3–4, 2013, pp. 301–  
732 10, doi:10.1016/j.ijpara.2012.11.011.
- 733 Mersha, Fana B., et al. “Computational and Experimental Analysis of the  
734 Glycophosphatidylinositol-Anchored Proteome of the Human Parasitic Nematode  
735 *Brugia Malayi*.” *PLoS ONE*, vol. 14, no. 9, Public Library of Science, 2019,  
736 doi:10.1371/journal.pone.0216849.
- 737 Metsalu, Tauno, and Jaak Vilo. “ClustVis: A Web Tool for Visualizing Clustering of  
738 Multivariate Data Using Principal Component Analysis and Heatmap.” *Web Server  
739 Issue Published Online*, vol. 43, 2015, doi:10.1093/nar/gkv468.
- 740 Michalski, Michelle L., and Gary J. Weil. “Gender-Specific Gene Expression in *Brugia*  
741 *Malayi*.” *Molecular and Biochemical Parasitology*, vol. 104, no. 2, Nov. 1999, pp. 247–  
742 57, doi:10.1016/S0166-6851(99)00149-8.
- 743 Moreno, Yovany, and Timothy G. Geary. “Stage- and Gender-Specific Proteomic Analysis of  
744 *Brugia Malayi* Excretory-Secretory Products.” *PLoS Neglected Tropical Diseases*, vol.  
745 2, no. 10, 2008, p. e326, doi:10.1371/journal.pntd.0000326.
- 746 Nutman, Thomas B. *Lymphatic Filariasis*. Vol. 1, PUBLISHED BY IMPERIAL COLLEGE

- 747 PRESS AND DISTRIBUTED BY WORLD SCIENTIFIC PUBLISHING CO., 2000,  
748 doi:10.1142/p048.
- 749 Pilobello, Kanoelani T., Deepika E. Slawek, et al. “A Ratiometric Lectin Microarray Approach  
750 to Analysis of the Dynamic Mammalian Glycome.” *Proceedings of the National*  
751 *Academy of Sciences of the United States of America*, vol. 104, no. 28, National  
752 Academy of Sciences, July 2007, pp. 11534–39, doi:10.1073/pnas.0704954104.
- 753 Pilobello, Kanoelani T., Lakshmipriya Krishnamoorthy, et al. “Development of a Lectin  
754 Microarray for the Rapid Analysis of Protein Glycopatterns.” *ChemBioChem*, vol. 6, no.  
755 6, June 2005, pp. 985–89, doi:10.1002/cbic.200400403.
- 756 Potter, Simon C., et al. “HMMER Web Server: 2018 Update.” *Web Server Issue Published*  
757 *Online*, vol. 46, 2018, doi:10.1093/nar/gky448.
- 758 Prasanphanich, Nina Salinger, et al. “Glycoconjugates in Host-Helminth Interactions.”  
759 *Frontiers in Immunology*, vol. 4, no. AUG, 2013, pp. 1–22,  
760 doi:10.3389/fimmu.2013.00240.
- 761 Prieto-Lafuente, L., et al. “MIF Homologues from a Filarial Nematode Parasite Synergize  
762 with IL-4 to Induce Alternative Activation of Host Macrophages.” *Journal of Leukocyte*  
763 *Biology*, vol. 85, no. 5, 2009, pp. 844–54, doi:10.1189/jlb.0808459.
- 764 Propheter, Daniel C., et al. “Fabrication of an Oriented Lectin Microarray.” *ChemBioChem*,  
765 vol. 11, no. 9, May 2010, pp. 1203–07, doi:10.1002/cbic.201000106.
- 766 Roberts, Adam, et al. “Improving RNA-Seq Expression Estimates by Correcting for  
767 Fragment Bias.” *Genome Biology*, vol. 12, no. 3, BioMed Central, Mar. 2011, p. R22,  
768 doi:10.1186/gb-2011-12-3-r22.
- 769 Rodríguez, Ernesto, et al. “Glycans from *Fasciola Hepatica* Modulate the Host Immune  
770 Response and TLR-Induced Maturation of Dendritic Cells.” *PLoS Neglected Tropical*  
771 *Diseases*, vol. 9, no. 12, Public Library of Science, Dec. 2015,  
772 doi:10.1371/journal.pntd.0004234.
- 773 Schraermeyer, U., et al. “Lectin Binding Studies on Adult Filariae, Intrauterine Developing  
774 Stages and Microfilariae of *Brugia Malayi* and *Litomosoides Carinii*.” *Parasitology*

- 775        *Research*, vol. 73, no. 6, Springer-Verlag, Nov. 1987, pp. 550–56,  
776        doi:10.1007/BF00535332.
- 777        Singh, Prashant K., et al. “Cofactor Independent Phosphoglycerate Mutase of *Brugia Malayi*  
778        Induces a Mixed Th1/Th2 Type Immune Response and Inhibits Larval Development in  
779        the Host.” *BioMed Research International*, vol. 2014, Hindawi Publishing Corporation,  
780        2014, doi:10.1155/2014/590281.
- 781        Smedley, Damian, et al. “The BioMart Community Portal: An Innovative Alternative to Large,  
782        Centralized Data Repositories.” *Ibounyamine Nabihoudine*, vol. 43, 2015,  
783        doi:10.1093/nar/gkv350.
- 784        Tawill, Salah, et al. “Both Free-Living and Parasitic Nematodes Induce a Characteristic Th2  
785        Response That Is Dependent on the Presence of Intact Glycans.” *Infection and*  
786        *Immunity*, vol. 72, no. 1, Jan. 2004, pp. 398–407, doi:10.1128/IAI.72.1.398-407.2004.
- 787        Trapnell, Cole, David G. Hendrickson, et al. “Differential Analysis of Gene Regulation at  
788        Transcript Resolution with RNA-Seq.” *Nature Biotechnology*, vol. 31, no. 1, Nature  
789        Publishing Group, Jan. 2013, pp. 46–53, doi:10.1038/nbt.2450.
- 790        Trapnell, Cole, Brian A. Williams, et al. “Transcript Assembly and Quantification by RNA-Seq  
791        Reveals Unannotated Transcripts and Isoform Switching during Cell Differentiation.”  
792        *Nature Biotechnology*, vol. 28, no. 5, Nature Publishing Group, May 2010, pp. 511–15,  
793        doi:10.1038/nbt.1621.
- 794        Tundup, Smanla, et al. “Polarization of Host Immune Responses by Helminth-Expressed  
795        Glycans.” *Annals of the New York Academy of Sciences*, vol. 1253, no. 1, 2012, pp.  
796        E1–E13, doi:10.1111/j.1749-6632.2012.06618.x.
- 797        van den Berg, Timo K., et al. “LacdiNAc-Glycans Constitute a Parasite Pattern for Galectin-  
798        3-Mediated Immune Recognition.” *The Journal of Immunology*, vol. 173, no. 3, The  
799        American Association of Immunologists, Aug. 2004, pp. 1902–07,  
800        doi:10.4049/jimmunol.173.3.1902.
- 801        Van Vliet, Sandra J., et al. *Carbohydrate Profiling Reveals a Distinctive Role for the C-Type*  
802        *Lectin MGL in the Recognition of Helminth Parasites and Tumor Antigens by Dendritic*

803           *Cells*. doi:10.1093/intimm/dxh246. Accessed 5 Aug. 2020.

804   Varki, Ajit; Cummings, R. D.; Esko, J. D.; Freeze, H. H.; Stanley, P.; Bertozzi, C. R.; Hart, G.  
805           W.; Etzler, M., and E. “Essentials of Glycobiology, 3rd Edition.” *Cold Spring Harbor*  
806           (NY), edited by Ajit Varki et al., Cold Spring Harbor (NY): Cold Spring Harbor  
807           Laboratory Press, 2015,  
808           <http://www.ncbi.nlm.nih.gov/pubmed/27010055>[https://www.ncbi.nlm.nih.gov/books/](https://www.ncbi.nlm.nih.gov/books/NBK310274/)  
809           NBK310274/.

810   Wuhrer, Manfred, et al. “Gender-Specific Expression of Complex-Type N-Glycans in  
811           Schistosomes.” *Glycobiology*, vol. 16, no. 10, Narnia, Oct. 2006, pp. 991–1006,  
812           doi:10.1093/glycob/cwl020.

813   Zhan, Bin, et al. “Ligand Binding Properties of Two *Brugia Malayi* Fatty Acid and Retinol  
814           (FAR) Binding Proteins and Their Vaccine Efficacies against Challenge Infection in  
815           Gerbils.” *PLOS Neglected Tropical Diseases*, edited by Patrick J. Lammie, vol. 12, no.  
816           10, Public Library of Science, Oct. 2018, p. e0006772,  
817           doi:10.1371/journal.pntd.0006772.

818

819

820

821

822

823

824 **Supplementary Material**

825

826 **Supp. Figure S1: Silver-stained SDS-PAGE analysis for chromatography quality**

827 **control.** Molecular weight markers are shown, wash and elution fractions were loaded to  
828 evaluate the quality of the chromatography. A significant reduction in proteomic content is  
829 observed between the wash and elution fractions validating the chromatography outcomes.

830

831 **Supp. Figure S2: Dimensionality reduction and clustering of the *B. malayi* secretome.**

832 A. MDS analysis of the *B. malayi* secretome coding gene expression across multiple life  
833 stages and sexes. Defined cluster represents the genes clustering with the known  
834 immunomodulatory protein coding genes (Highlighted in Blue). A single cluster of genes is  
835 reported to include all four known candidates. A total number of 101 genes are part of the  
836 cluster. B. PCA analysis of the *B. malayi* secretome coding gene expression across multiple  
837 life stages and sexes. Defined cluster represents the genes clustering with the known  
838 immunomodulatory protein coding genes (Highlighted in Blue). Two separate clusters are  
839 reported to include all four known candidates. Combined, both clusters include 72 genes  
840 clustering with known candidates.

841

842 **Supp. Table S1: Stage and sex-specific *B. malayi* secretome analysis.**

843 **Supp. Table S2: *B. malayi* glycotranscriptome analysis.**

844 **Supp. Table S3: Differential glycosylation comparative analysis between adult male and**  
845 **female *B. malayi*.**

846 **Supp. Table S4: Dimensionality reduction approaches to *B. malayi* ES transcriptome**  
847 **for immunomodulatory candidate identification.**

848 **Supp. Table S5: *B. malayi* glycogenome characterization by multiple functional**  
849 **annotation approaches.**

850 **Supp. Table S6: Lists of Lectins used for glycoprofiling of adult male and female *B.***  
851 ***malayi* and corresponding list of lectins displaying sex-specific differential binding.**
